# Supplementary material for: Growth behavior of water dispersed MgAl layered double hydroxide nanosheets
Source: Royal Society of Chemistry journal article supplement (doi:10.1039/c7ra00833c), 2017-01-01
Supplement: c7ra00833c1.pdf [file c7ra00833c1.pdf]

Fig. S1 XRD patterns of (a) background and MgAl-LDH nanosheets standing for (b) 24 h, (c) 48 h, (d) 55h.

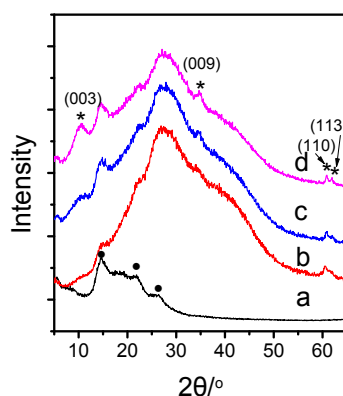

**Fig. S1** showed patterns of background (a), and that of MgAl-LDH nanosheets standing for 24 h, 48 h, 55 h (b-d), respectively. For sample standing for 24 h, the missing of (003) reflection at  $2\theta$  of  $11.5^\circ$  and obvious (110) reflection at  $2\theta$  of  $61^\circ$  indicated that the 2D crystalline LDH layer had been formed. The characteristic reflections of (003) and (009) at  $2\theta$  of  $11.5$  and  $36^\circ$  became stronger with the increase of standing time, which indicated nanosheets stacked to build a three-dimensional network and the integrated plate-like structure of LDH was formed progressively.
